# Supplementary material for: Pre-COVID-19 pandemic health-related behaviours in children (2018–2020) and association with being tested for SARS-CoV-2 and testing positive for SARS-CoV-2 (2020–2021): a retrospective cohort study using survey data linked with routine health data in Wales, UK
Source: HighWire-hosted journal article supplement (doi:10.1136/bmjopen-2022-061344), 2022-09-01
Supplement: bmjopen-2022-061344supp004_data_supplement.pdf [file bmjopen-2022-061344supp004_data_supplement.pdf]

## Online supplemental appendix 4: HAPPEN survey variable codebook

| Exposures                        | HAPPEN Survey item                                                          | Responses                                                                                                | Analyses coding                                                                                                      |
|----------------------------------|-----------------------------------------------------------------------------|----------------------------------------------------------------------------------------------------------|----------------------------------------------------------------------------------------------------------------------|
| <b>Ate breakfast</b>             | 13. <i>What did you eat for breakfast yesterday?</i>                        | Nothing<br>Cereal<br>Snacks<br>Fruit<br>Toast<br>Cooked breakfast<br>Yoghurt                             | Binary:<br>1 = Cereal; Snacks;<br>Fruit; Toast; Cooked breakfast; Yoghurt<br>0 = Nothing                             |
| <b>Active travel to school</b>   | 14. <i>How did you get to school yesterday morning?</i>                     | On the bus<br>In the car/taxi<br>Walked<br>On bike<br>Ran/jogged<br>Scooter<br>Skateboarded/rollerbladed | Binary:<br>1 = Walked; On bike; Ran/jogged;<br>Scooter; Skateboarded/rollerbladed<br>0 = On the bus; In the car/taxi |
| <b>Active travel from school</b> | 18. <i>How did you get home yesterday?</i>                                  | On the bus<br>In the car/taxi<br>Walked<br>On bike<br>Ran/jogged<br>Scooter<br>Skateboarded/rollerbladed | Binary:<br>1 = Walked; On bike; Ran/jogged;<br>Scooter; Skateboarded/rollerbladed<br>0 = On the bus; In the car/taxi |
| <b>Toothbrush 2+ per day</b>     | 20. <i>How many times did you brush your teeth yesterday?</i>               | 0 – 3                                                                                                    | Continuous:<br>0 – 3                                                                                                 |
| <b>5+ fruit and veg</b>          | 19. <i>How many portions of fruit and vegetables did you eat yesterday?</i> | 0 – 8                                                                                                    | Continuous:<br>0 – 8                                                                                                 |

## Online supplemental appendix 4: HAPPEN survey variable codebook

|                                                             |                                                                                                                                                                                                                                     |                                                            |                                                                        |
|-------------------------------------------------------------|-------------------------------------------------------------------------------------------------------------------------------------------------------------------------------------------------------------------------------------|------------------------------------------------------------|------------------------------------------------------------------------|
| <b>Sleep 9+ hours</b>                                       | 21. <i>What time did you fall asleep last night</i>                                                                                                                                                                                 | (30 min intervals)<br>7:00pm – 4:00am                      | Continuous:<br><i>Sleep hours calculated from item 21 and 22</i>       |
|                                                             | 22. <i>What time did you wake up this morning?</i>                                                                                                                                                                                  | (30 min intervals)<br>5:00am – 9:00am                      |                                                                        |
| <b>Physically active 60+ mins every day previous 7 days</b> | 23. <i>In the last 7 days, how many days did you do sports or exercise for at least 1 hour in total (This includes doing any activities or playing sports where your heart beat faster, you breathed faster and you felt warmer</i> | 0 days<br>1 – 2 days<br>3 – 4 days<br>5 – 6 days<br>7 days | Ordinal:<br>0 days<br>1 – 2 days<br>3 – 4 days<br>5 – 6 days<br>7 days |
|                                                             | 24. <i>In the last 7 days, how many days did you watch TV/play online games/use the internet etc. for 2 or more hours a day (in total)?</i>                                                                                         | 0 days<br>1 – 2 days<br>3 – 4 days<br>5 – 6 days<br>7 days | Ordinal:<br>0 days<br>1 – 2 days<br>3 – 4 days<br>5 – 6 days<br>7 days |
|                                                             |                                                                                                                                                                                                                                     |                                                            |                                                                        |
|                                                             |                                                                                                                                                                                                                                     |                                                            |                                                                        |
|                                                             |                                                                                                                                                                                                                                     |                                                            |                                                                        |
| <b>Tired 7 days</b>                                         | 25. <i>In the last 7 days, how many days did you feel tired?</i>                                                                                                                                                                    | 0 days<br>1 – 2 days<br>3 – 4 days<br>5 – 6 days<br>7 days | Ordinal:<br>0 days<br>1 – 2 days<br>3 – 4 days<br>5 – 6 days<br>7 days |
|                                                             |                                                                                                                                                                                                                                     |                                                            |                                                                        |
|                                                             |                                                                                                                                                                                                                                     |                                                            |                                                                        |
|                                                             |                                                                                                                                                                                                                                     |                                                            |                                                                        |
|                                                             |                                                                                                                                                                                                                                     |                                                            |                                                                        |

## Online supplemental appendix 4: HAPPEN survey variable codebook

|                                                      |                                                                                                          |                                                            |                                                                        |
|------------------------------------------------------|----------------------------------------------------------------------------------------------------------|------------------------------------------------------------|------------------------------------------------------------------------|
| <b>Sugary snack 7 days</b>                           | 28. In the last 7 days, how many days did you eat at least one sugary snack (e.g. chocolate bar, sweets) | 0 days<br>1 – 2 days<br>3 – 4 days<br>5 – 6 days<br>7 days | Ordinal:<br>0 days<br>1 – 2 days<br>3 – 4 days<br>5 – 6 days<br>7 days |
| <b>Participate in at least 3 out of school clubs</b> | 31. How many times do you take part in a sports club OUTSIDE OF SCHOOL each week?                        | 0 - 10                                                     | Continuous:<br>0 - 10                                                  |
| <b>Can ride a bike</b>                               | 35. Can you ride a bike without stabilisers?                                                             | No<br>Yes                                                  | Binary:<br>1 = Yes<br>0 = No                                           |
| <b>Can swim 25m</b>                                  | 36. Can you swim 25 metres without a float or armbands (This is 1 length of a standard swimming pool)    | No<br>Yes                                                  | Binary:<br>1 = Yes<br>0 = No                                           |
| <b>Age on 01/03/2020</b>                             | Decimal age on 1 March 2020                                                                              | Continuous                                                 | Continuous                                                             |
| <b>Sex</b>                                           | Sex                                                                                                      | Girl<br>Boy                                                | Binary:<br>0 = Girl<br>1 = Boy                                         |
| <b>WIMD</b>                                          | Welsh Index of Multiple Deprivation 2019                                                                 |                                                            | Coding framework from WIMD 2019[34]                                    |
